# Supplementary material for: The Highly Conserved Barley Powdery Mildew Effector BEC1019 Confers Susceptibility to Biotrophic and Necrotrophic Pathogens in Wheat
Source: PubMed Central journal article supplement (PMC6770355; doi:10.3390/ijms20184376), 2019-09-06
Supplement: ijms-20-04376-s001.pdf [file ijms-20-04376-s001.pdf]

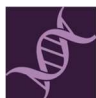

**BEC1019 in  
base stem  
and root**

**BEC1019  
in leaf**

**Actin**

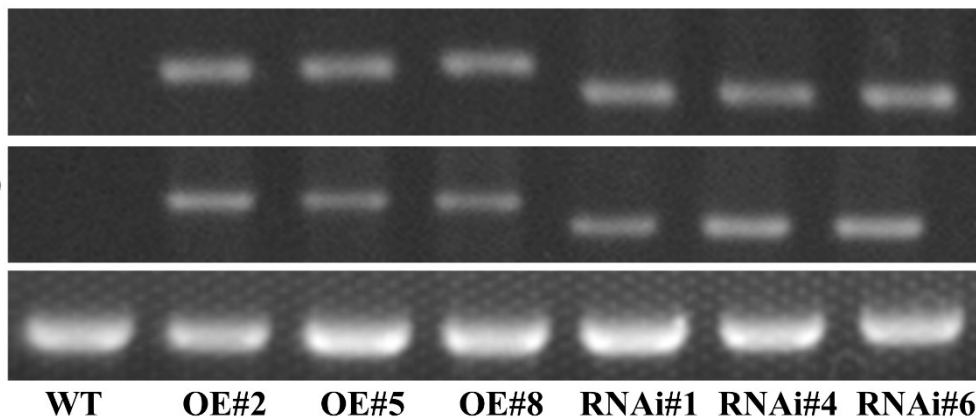

**Figure 1.** Amino acid sequence alignment of BEC1019 homologs in different plant pathogens using DNAMAN software.

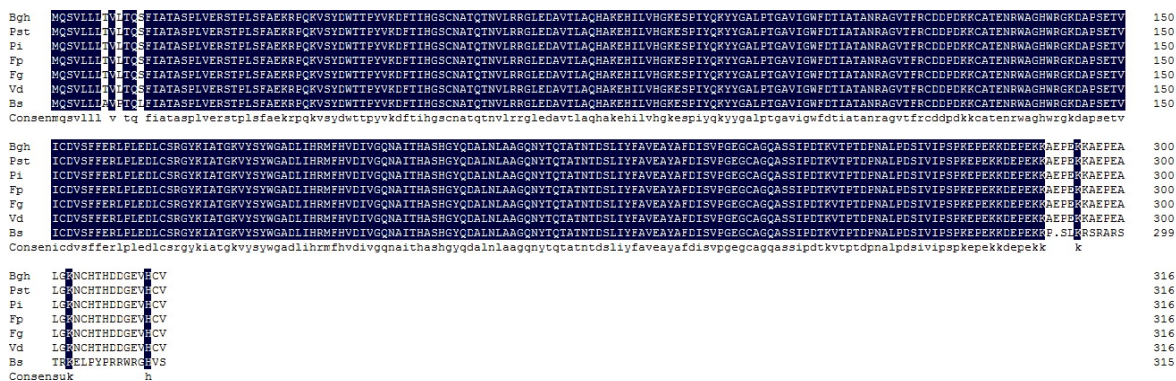

**Figure 2.** Semi-quantitative RT-PCR analysis of BEC1019 expression in RNAi and overexpressing plants. *TaActin* transcripts were quantified as an internal control.
